# Supplementary material for: Zika virus infects renal proximal tubular epithelial cells with prolonged persistency and cytopathic effects
Source: PubMed Central journal article supplement (PMC5583673; doi:10.1038/emi.2017.67), 2017-08-23
Supplement: emi201767x1.pdf [file emi201767x1.pdf]

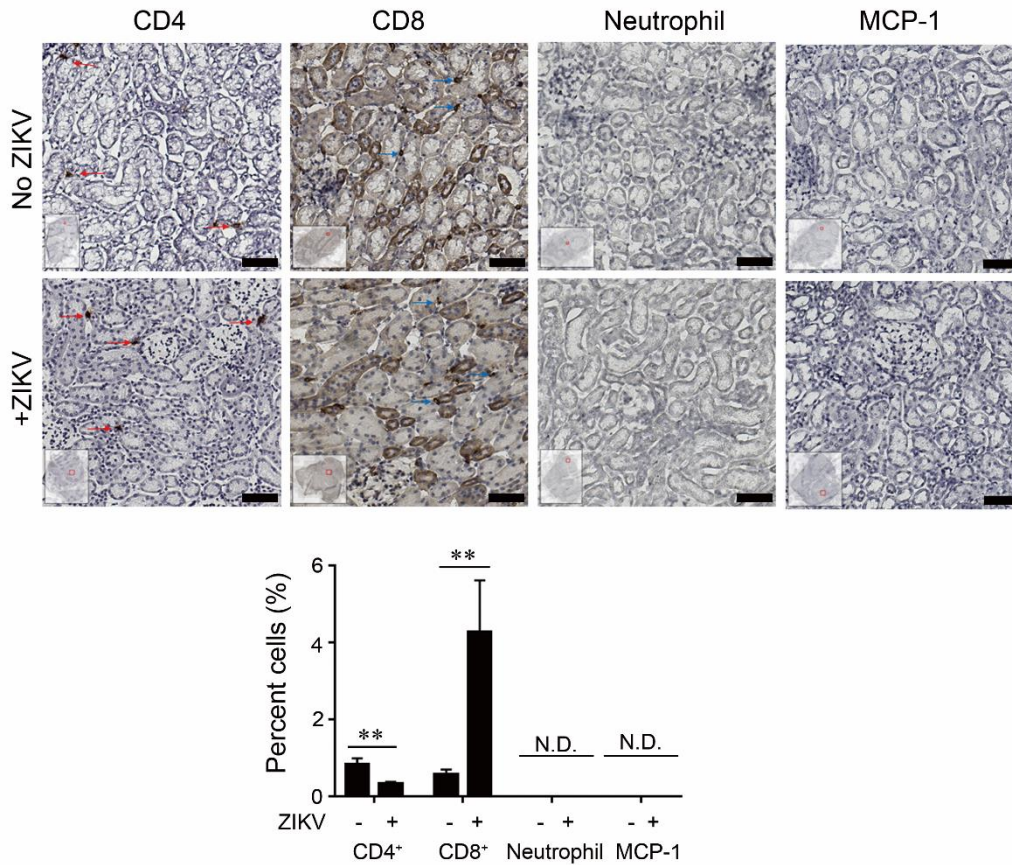

**Supplemental Figure 1. Immunohistochemical staining of kidneys in mock and ZIKV-infected mice.** MCP-1, monocyte chemoattractant protein-1. Upper panel, representative images. Red and blue arrows donate infiltrated CD4<sup>+</sup> and CD8<sup>+</sup> T cells, respectively. Scale bar, 50  $\mu$ m. Lower panel, statistical analyses. \*\*, significant difference between mock and infected groups ( $p < 0.01$ , Student's  $t$  test). N.D., not detected.
