# Supplementary material for: Zika virus infects renal proximal tubular epithelial cells with prolonged persistency and cytopathic effects
Source: PubMed Central journal article supplement (PMC5583673; doi:10.1038/emi.2017.67), 2017-08-23
Supplement: emi201767x2.pdf [file emi201767x2.pdf]

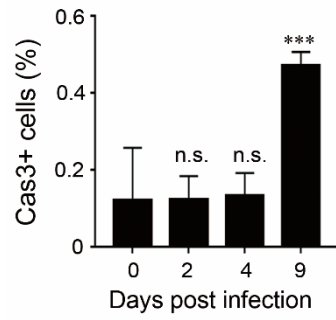

**Supplemental Figure 2. SZ01 ZIKV-induced apoptosis in primary hRPTEpiCs.**

\*\*\*, significantly different from day 0 group ( $p < 0.001$ , Student's  $t$  test). n.s., not significantly different from day 0 group.
