# Supplementary material for: Zika virus infects renal proximal tubular epithelial cells with prolonged persistency and cytopathic effects
Source: PubMed Central journal article supplement (PMC5583673; doi:10.1038/emi.2017.67), 2017-08-23
Supplement: emi201767x3.pdf [file emi201767x3.pdf]

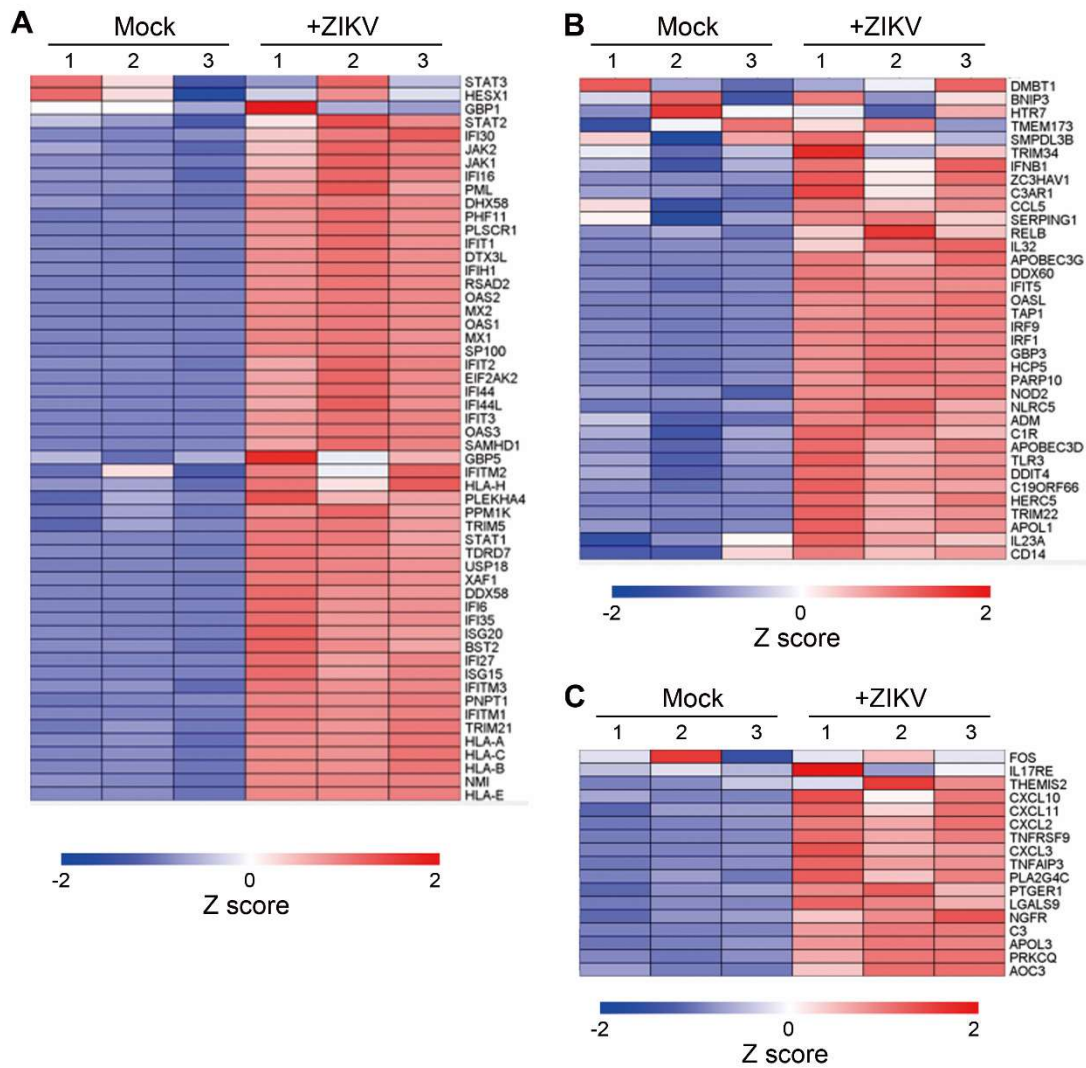

**Supplementary Figure 3. ZIKV-induced up-regulation of type I IFN signaling (A), anti-viral responsive (B) and inflammatory genes (C). Differential gene expression is displayed as Z-score.**
