# Supplementary material for: Zika virus infects renal proximal tubular epithelial cells with prolonged persistency and cytopathic effects
Source: PubMed Central journal article supplement (PMC5583673; doi:10.1038/emi.2017.67), 2017-08-23
Supplement: emi201767x4.pdf [file emi201767x4.pdf]

**Supplementary Table 1. Top 30 up-regulated genes upon ZIKV infection.**

| <b>Gene symbol</b> | <b>Description</b>                                              | <b>log<sub>2</sub>FC</b> | <b>P value</b> |
|--------------------|-----------------------------------------------------------------|--------------------------|----------------|
| KLHDC7B            | kelch domain containing 7B                                      | 5.54939                  | 1.20E-162      |
| IFI27              | interferon alpha inducible protein 27                           | 5.30723                  | 8.99E-192      |
| MX2                | MX dynamin like GTPase 2                                        | 4.99477                  | 6.73E-225      |
| VGF                | VGF nerve growth factor inducible                               | 4.98097                  | 2.55E-17       |
| LCN2               | lipocalin 2                                                     | 4.68728                  | 5.55E-11       |
| HSH2D              | hematopoietic SH2 domain containing                             | 4.45578                  | 7.96E-08       |
| LAMP3              | lysosomal associated membrane protein 3                         | 4.41970                  | 4.29E-56       |
| RSAD2              | radical S-adenosyl methionine domain containing<br>2            | 4.37088                  | 1.39E-134      |
| RAB39B             | RAB39B, member RAS oncogene family                              | 4.36688                  | 6.70E-15       |
| BIRC3              | baculoviral IAP repeat containing 3                             | 4.31874                  | 3.17E-164      |
| FBXO39             | F-box protein 39                                                | 4.23834                  | 6.80E-24       |
| IFI44L             | interferon induced protein 44 like                              | 4.22714                  | 3.30E-121      |
| OASL               | 2'-5'-oligoadenylate synthetase like                            | 4.16907                  | 1.39E-91       |
| SMTNL1             | smoothelin like 1                                               | 4.13638                  | 1.10E-07       |
| ODF3B              | outer dense fiber of sperm tails 3B                             | 3.97927                  | 9.15E-90       |
| ISG15              | ISG15 ubiquitin-like modifier                                   | 3.97379                  | 1.95E-108      |
| ZBP1               | Z-DNA binding protein 1                                         | 3.97177                  | 1.25E-06       |
| MX1                | MX dynamin like GTPase 1                                        | 3.85401                  | 6.59E-129      |
| IFI6               | interferon alpha inducible protein 6                            | 3.82001                  | 1.59E-143      |
| HERC5              | HECT and RLD domain containing E3 ubiquitin<br>protein ligase 5 | 3.77968                  | 3.25E-100      |
| ITPKA              | inositol-trisphosphate 3-kinase A                               | 3.76800                  | 4.36E-49       |
| PCDH1              | protocadherin 1                                                 | 3.74880                  | 6.71E-21       |
| CMPK2              | cytidine/uridine monophosphate kinase 2                         | 3.74050                  | 5.40E-117      |
| SYT7               | synaptotagmin 7                                                 | 3.66082                  | 4.43E-45       |
| TYMP               | thymidine phosphorylase                                         | 3.65178                  | 1.57E-128      |
| C3                 | complement component 3                                          | 3.60419                  | 4.17E-72       |
| SLC15A3            | solute carrier family 15 member 3                               | 3.57692                  | 7.07E-83       |
| H1F0               | H1 histone family member 0                                      | 3.52118                  | 7.82E-113      |
| STK32A             | serine/threonine kinase 32A                                     | 3.48820                  | 9.46E-12       |
| RPLP0P2            | ribosomal protein lateral stalk subunit P0<br>pseudogene 2      | 3.45723                  | 2.49E-13       |

Note: only genes with significant differential expression ( $p < 0.05$ ) are listed.
