# Supplementary material for: Zika virus infects renal proximal tubular epithelial cells with prolonged persistency and cytopathic effects
Source: PubMed Central journal article supplement (PMC5583673; doi:10.1038/emi.2017.67), 2017-08-23
Supplement: emi201767x5.pdf [file emi201767x5.pdf]

**Supplementary Table 2. Top 30 down-regulated genes upon ZIKV infection.**

| Gene symbol  | Description                                                        | log <sub>2</sub> FC | P value |
|--------------|--------------------------------------------------------------------|---------------------|---------|
| GRIN2A       | glutamate ionotropic receptor NMDA type subunit 2A                 | -4.79746            | 0.00058 |
| GABRG3       | gamma-aminobutyric acid type A receptor gamma3 subunit             | -4.67209            | 0.00021 |
| TMEM132C     | transmembrane protein 132C                                         | -4.63318            | 0.00173 |
| CDH18        | cadherin 18                                                        | -4.62527            | 0.00004 |
| KCNH5        | potassium voltage-gated channel subfamily H member 5               | -4.61708            | 0.00141 |
| HTR2C        | 5-hydroxytryptamine receptor 2C                                    | -4.56975            | 0.00070 |
| RXFP1        | relaxin/insulin like family peptide receptor 1                     | -4.49232            | 0.00116 |
| DSCAM        | DS cell adhesion molecule                                          | -4.48518            | 0.00020 |
| SHISA6       | shisa family member 6                                              | -4.47911            | 0.00068 |
| TRDN         | triadin                                                            | -4.47033            | 0.00259 |
| ADCY2        | adenylate cyclase 2 (brain)                                        | -4.44641            | 0.00032 |
| RBFOX1       | RNA binding protein, fox-1 homolog 1                               | -4.43111            | 0.00006 |
| NRXN1        | neurexin 1                                                         | -4.42025            | 0.00024 |
| POU6F2       | POU class 6 homeobox 2                                             | -4.41629            | 0.00070 |
| KHDRBS2      | KH RNA binding domain containing, signal transduction associated 2 | -4.39610            | 0.00122 |
| CCDC26       | CCDC26 long non-coding RNA                                         | -4.38129            | 0.00223 |
| LRRTM4       | leucine rich repeat transmembrane neuronal 4                       | -4.36334            | 0.00013 |
| MIR4300HG    | MIR4300 Host Gene                                                  | -4.34499            | 0.00044 |
| LMOD1        | leiomodoin 1                                                       | -4.33658            | 0.00000 |
| LOC102724623 | Uncharacterized                                                    | -4.32051            | 0.00030 |
| RNF219-AS1   | RNF219 antisense RNA 1                                             | -4.31415            | 0.00038 |
| NDST4        | N-deacetylase/N-sulfotransferase 4                                 | -4.31229            | 0.00155 |
| ZNF804B      | zinc finger protein 804B                                           | -4.30261            | 0.00041 |
| ANKFN1       | ankyrin repeat and fibronectin type III domain containing 1        | -4.28082            | 0.00035 |
| NXPH1        | neurexophilin 1                                                    | -4.26383            | 0.00177 |
| FSTL5        | follistatin like 5                                                 | -4.26258            | 0.00027 |
| PCDH11X      | protocadherin 11 X-linked                                          | -4.25328            | 0.00024 |
| LY86-AS1     | LY86 antisense RNA 1                                               | -4.23944            | 0.00082 |
| LINC01483    | long intergenic non-protein coding RNA 1483                        | -4.23537            | 0.00148 |
| RIT2         | Ras like without CAAX 2                                            | -4.23054            | 0.00109 |

Note: only genes with significant differential expression ( $p < 0.05$ ) are listed.
